# Supplementary material
Source: PubMed Central journal article supplement (PMC4068256)
Supplement: cb500154m_si_001.pdf [file cb500154m_si_001.pdf]

## Supporting Information for:

### **Gyramides inhibit bacterial growth by inhibiting DNA gyrase and altering chromosome topology**

*Manohary Rajendram,<sup>1^</sup> Katherine A. Hurley,<sup>2^</sup> Marie H. Foss,<sup>1</sup> Kelsey M. Thornton,<sup>1</sup>  
Jared T. Moore,<sup>3</sup> Jared T. Shaw,<sup>3</sup> and Douglas B. Weibel<sup>1, 4\*</sup>*

*1. Department of Biochemistry, University of Wisconsin-Madison, Madison, WI 53706,  
USA*

*2. Department of Pharmaceutical Sciences, University of Wisconsin-Madison, Madison,  
WI 53706, USA*

*3. Department of Chemistry, University of California-Davis, Davis, CA 95616, USA*

*4. Department of Chemistry, University of Wisconsin-Madison, Madison, WI 53706,  
USA*

<sup>^</sup> denotes equal contribution

\*Author to whom correspondence should be addressed:

Douglas B. Weibel

Departments of Biochemistry, Chemistry, and Biomedical Engineering

6424A Biochemical Sciences Building

440 Henry Mall

Madison WI 53706 SUA

Phone: (608) 890-1342

E-mail: [weibel@biochem.wisc.edu](mailto:weibel@biochem.wisc.edu)

**Figure S1.** Brightfield A) and DAPI-labeled B) image of *E. coli* BW25113  $\Delta$ *tolC* treated with **3** showing filamentous cells and compacted, irregularly arranged nucleoids, respectively. Brightfield (C–G) and DAPI-labeled (H–L) images of spontaneous mutants resistant to **3** without treatment. Brightfield (M–Q) and DAPI-labeled (R–V) cells of the same mutants after treatment with **3**. The lettering on the top left of each panel refers to the corresponding amino acid mutation in DNA gyrase from the isolated spontaneous mutants.

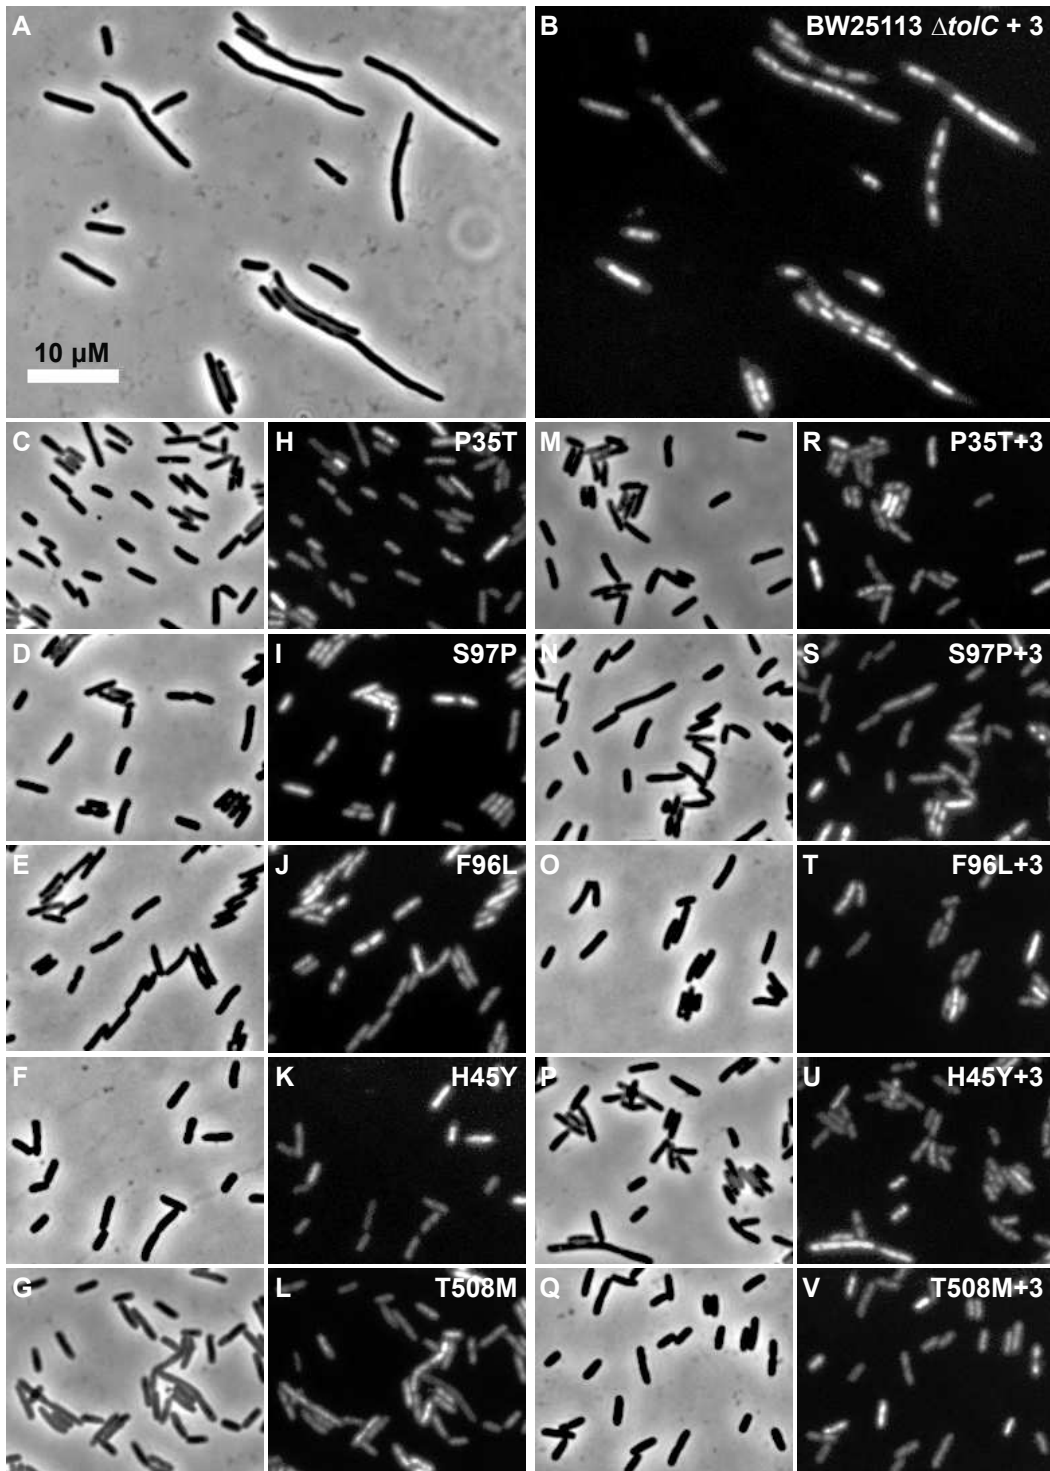

## Figure S1

**Table S1:** MICs for **1**, **2**, and **3** against *E. coli* BW25113  $\Delta tolC$  and spontaneous mutants conferring resistance to **3**.

| Strain                                                  |                | <b>3</b> MIC ( $\mu\text{g mL}^{-1}$ )<br>[ $\mu\text{M}$ ] | <b>2</b> MIC ( $\mu\text{g mL}^{-1}$ )<br>[ $\mu\text{M}$ ] | <b>1</b> MIC ( $\mu\text{g mL}^{-1}$ )<br>[nM] |
|---------------------------------------------------------|----------------|-------------------------------------------------------------|-------------------------------------------------------------|------------------------------------------------|
| <i>E. coli</i> BW25113<br>$\Delta tolC$ (parent strain) |                | 4.1 [10]                                                    | 0.77 [1.25]                                                 | 0.002 [5]                                      |
| <b>3</b> <sup>R</sup><br>isolates                       | GyrA Pro35Thr  | >41 [>100]                                                  | 0.77 [1.25]                                                 | 0.002 [5]                                      |
|                                                         | GyrA Ser97Pro  | >41 [>100]                                                  | 0.77 [1.25]                                                 | 0.002 [5]                                      |
|                                                         | GyrA Phe96Leu  | >41 [>100]                                                  | 0.77 [1.25]                                                 | 0.004 [10]                                     |
|                                                         | GyrA His45Tyr  | >41 [>100]                                                  | 0.77 [1.25]                                                 | 0.004 [10]                                     |
|                                                         | GyrB Thr508Met | >41 [>100]                                                  | 0.77 [1.25]                                                 | 0.004 [10]                                     |
